# Supplementary material for: Vaccination against the Protozoan Parasite Histomonas meleagridis Primes the Activation of Toll-like Receptors in Turkeys and Chickens Determined by a Set of Newly Developed Multiplex RT-qPCRs
Source: MDPI journal article supplement (doi:10.3390/vaccines9090960), 2021-08-27
Supplement: s1 [file s1]

**Supplementary Table S1:** Optimized set-up for multiplex RT-qPCR and concentrations of all candidate genes primers and probes are given with efficiency value for turkey and chicken species. For every candidate gene, 100nM of probe concentrations was used for all genes.

| Set | gene symbol                  | primer concentrations (nM) for turkey | efficiency for turkey (%) | primer concentrations (nM) for chicken | efficiency for chicken (%) |
|-----|------------------------------|---------------------------------------|---------------------------|----------------------------------------|----------------------------|
| 1   | <i>TLR 1A</i>                | 200                                   | 98.56                     | 300                                    | 96.78                      |
|     | <i>TLR 2A</i>                | 200                                   |                           | 500                                    |                            |
|     | <i>TLR 5</i>                 | 200                                   |                           | 500                                    |                            |
| 2   | <i>TLR 1B</i>                | 200                                   | 99.48                     | 200                                    | 102.3                      |
|     | <i>TLR 2B</i>                | 200                                   |                           | 200                                    |                            |
|     | <i>TLR 3</i>                 | 200                                   |                           | 200                                    |                            |
|     | <i>TLR 4</i>                 | 400                                   |                           | 400                                    |                            |
| 3   | <i>TLR 6</i>                 | 600                                   | 96.75                     | N.A.                                   |                            |
|     | <i>TLR 7</i>                 | 400                                   |                           |                                        |                            |
|     | <i>TLR 13</i>                | 400                                   |                           |                                        |                            |
| 4   | <i>TLR 7</i>                 | N.A.                                  |                           | 600                                    | 94.78                      |
|     | <i>TLR 21</i>                |                                       |                           | 400                                    |                            |
| 5   | <i>IL1<math>\beta</math></i> | 400                                   | 97.73                     | 400                                    | 97.34                      |
|     | <i>IL6</i>                   | 200                                   |                           | 600                                    |                            |
| 6   | <i>RPL 13</i>                | 300                                   | 98.72                     | 500                                    | 99.12                      |
|     | <i>TFRC</i>                  | 400                                   |                           | 400                                    |                            |

N.A.: Not applicable

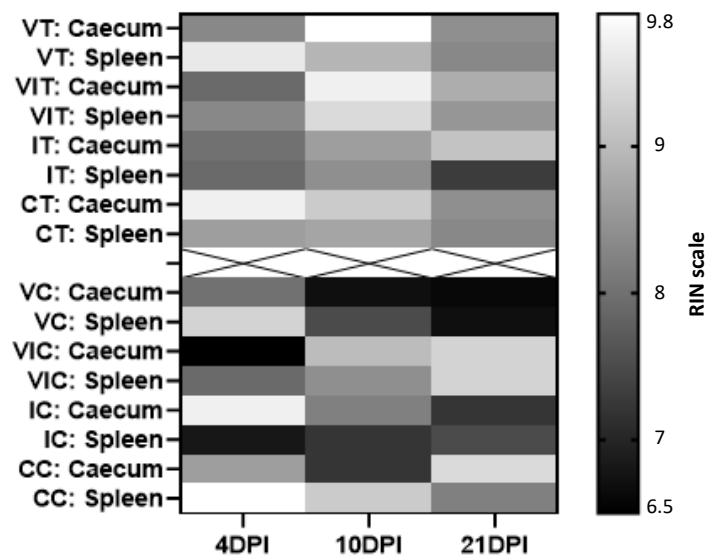

**Supplementary Figure S1:** Mean RNA integrity number (RIN) of each organ measured by Bioanalyzer 2100 (Agilent technologies) for all samples used in the present study.
